# Supplementary material
Source: Elsevier journal article supplement (https://www.sciencedirect.com/science/article/pii/S0301054620300884)
Supplement: mmc1 [file S0301054620300884:mmc1.docx]

**List of apitherapy books**

1. Ahnert P. Beehive alchemy. Beverly, MA, USA (Quarto Publishing Group) 2018
2. Altman N. The honey prescription. Rochester, VT, USA (Healing Art Press) 2010
3. Alfahdawi I. Propolis in medicine & dentistry. Saarbrücken (Lambert Academic Publishing) 2017
4. Avril G. La santé naturell avec l’apithérapie. Miel, propolis, pollen, gelée royale. Mens (Terre vivante) 2014
5. Asis M. Abridged apitherapy 101 clinical forms. Create Space 2017
6. Bänziger E. Honig – Genuss und Gesundheit aus dem Bienenstock. Küttinger, CH (Midena) 1997
7. Ballot-Flurin C. L’apithérapie. Paris, Frankreich (Eyrolles) 2015
8. Bankhofer H. Gelée royale für Schönheit, Jugend und Gesundheit. Wien (Kneipp) 2014
9. Beck BF. The bible of bee venom therapy. Silver Spring, MD, USA (Health Resources Press) 1997
10. Beck BF. Honey and health. New York (Robert Mc Bride and Company) 1938
11. Beyer KA. Bienen helfen…bei Rheuma, Frauenkrankheiten, Männerbeschwerden, Sportverletzungen und anderem mehr. München (Edition AUM) 1986
12. Boukraâ L. Honey in traditional and modern medicine. Roca Baton, FL, USA (CRC Press) 2014
13. Bort R. Honig, Pollen, Propolis – Sanfte Heilkraft aus dem Bienenstock. Stuttgart (Franck-Kosmos) 2010
14. Bort R, Berger-Martener B, Albersmann H. Apitherapie – Heilen mit Bienenprodukten. Weilheim-Marnbach (Deutscher Apitherapie Bund) 2007
15. Broadhurst CL. User’s guide to propolis, royal jelly, honey, and bee pollen. Laguna Beach, CA, USA (Basic Health Publications) 2005
16. Broadhurst CL. Bee products for better health. Summertown, TN, USA (books alive) 2013
17. Brown R. The world’s only perfect food. The bee pollen bible. Prescott, USA (Hohm Press) 1993
18. Brown R. Bee hive product bible. Garden City Park, New York, USA (Avery Publishung Group Inc) 1993
19. Caillas A, Ronneburg WE. Drei Schätze der Gesundheit. Greifenberg (Urs Freund) 1989
20. Cardinault N. Soignez-vous avec les produits de la ruche. Vergèze, F, (Thierry Souccar Éditions) 2016
21. Carlsson S. Natürlich heilen und gesund bleiben mit Honig: Die Wirkung dieses Heilmittels für Gesundheit, Vitalität und Körperpflege. Berlin (Urania) 1998
22. Cerelli L. Apitherapy from a beekeepers perspective. Hot Springs, USA (Peace Publishers) 2016
23. Cherbuliez T, Domerego R. L'apithérapie: médecine des abeilles. ? (éditions Amyris) 2007
24. Croft L. Honey and health. Wellingborough, Northhamptonshire, GB (Thorsons Publishing Group) 1987
25. Croft LR. Honey and hay fever. Salford 1980
26. Darrigol JL. Apithérapie. Miel, pollen, propolis, gelée royale. Paris, Frankreich (Dangles) 2007
27. Domerego R. The healing bee. Mytholmroyd, Vereinigtes Königreich (Northern Bee Books) 2016
28. Domerego R, Imbert G, Blanchard C. Les remèdes de la ruche. Monaco (Editions Alpen) 2016
29. Domerego R. The healing bee. Mytholmroyd (Northern Bee Books) 2016
30. Donadieu Y. Die Erzeugnisse des Bienenvolkes, Natürliche Heilbehandlungen. 1982
31. Donadieu Y. Der Pollen: Natürliche Heilbehandlungen. Oppenau (C. Koch) 1991
32. Donadieu Y. Gelée royale: Natürliche Heilbehandlungen. Oppenau (Imkerei Technik) 2006
33. Donadieu Y. Die Propolis: Natürliche Heilbehandlungen. Oppenau (Imkerei Technik) 2009
34. Dörner IS. Kochen und heilen mit Honig. Düsseldorf (Econ & List) 1998
35. Ebel G. Gesundheit aus der Bienen-Apotheke. Genf/München (Ariston) 1994
36. Eberl-Kadlec S. A bridge BEEtween medicines. Noderstedt (Books on Demand) 2017
37. Ehmann H. Gesundheit aus dem Bienenstock. Bielefeld (Lebensbaum) 2002
38. Enders P. An introduction to apitherapy. CreateSpace Independent Publishing Platform, 2016
39. Fearnley J. Bee propolis – natural healing from the hive. London, GB (Souvenir Press Ltd.) 2001
40. Fessenden R. The new honey revolution. Colorado Springs, CO, USA (Xulon) 2014
41. Fournier R. ABC de l’apithérapie. Paris, Frankreich (Grancher) 2009
42. Frank R. Honig – köstlich, gesund und vielseitig. Stuttgart (Ulmer) 2016
43. Gendrolis A. Propolis natural medicine. Wroclaw, PL (JCS) 2017
44. Gibson CK. Making healing remedies with honey and propolis. Wroclaw, PL (JCS) 2018
45. Haghofer E. Honigmassage. Apitherapie. Norderstedt (Books on Demand) 2012
46. Hainbuch F. Bienen - wie sie helfen, wie sie heilen. Stuttgart (FA Herbig) 2019
47. Hainbuch F. Medizin ohne Beipackzettel. Die kleinen Helden und ihre Bienenprodukte. Rezepturen bei Beschwerden von A-Z. Aachen (Shaker) 2015
48. Hainbuch F. Bienengiftbuch – Akupunktur mit Bienengift und Bienenstichen Leipzig (Einbuch) 2016
49. Hainbuch F. Die Heilkraft der Bienen – Honig & Co. Bei Beschwerden von A-Z. Kandern (Narayana) 2013
50. Hanke E, Wegner E. Honig – Süße Medizin und sanfte Kosmetik für ihr Wohlbefunden. München (Knaur) 1998
51. Harnay V. Erzeugnisse des Bienenvolkes – Nahrung, Gesundheit, Schönheit. Madrid (Apimondia) 1974
52. Harnay V. Ein kostbares Erzeugnis des Bienenvolkes: Die Propolis – Wissenschaftliche Untersuchungen und Meinungen über Zusammensetzung, Eigenschaften und therapeutische Anwendung. Bukarest (Apimondia) 1975
53. Harney V. Neues in der Apitherapie. II. internationales Apitherapie-Synposium. Bukarest (Apimondia) 1976
54. Harnay V. Apitherapie heute. Bukarest (Apimondia) 1980
55. Harnisch G. Die Entgiftungsmassage mit Honig. Bietigheim (Turm) 2008
56. Havenland G. Honey – nature’s golden healer. London (Kyle Cathie Ltd.) 2010
57. Havera F. Manuka Honig für Anfänger. Cheyenne, WY, USA (Manuka Honig Helden) 2018
58. Herold E. Heilwerte aus dem Bienenvolk. München (Ehrenwirth) 1988
59. Hill R. Propolis Kittharz- das natürliche Antibiotikum. München (Ehrenwirth) 1989
60. Iliescu NV. Apitherapie heute. Bukarest (Apimondia) 1976
61. Iliescu NV. Apitherapie heute. Bukarest (Apimondia) 1980
62. Ioïriche N. Les propriété médicinales du miel et du venin d’abeille. Moskau 1960
63. Jarvis DC. Honig und andere Naturprodukte. Bukarest (Apimondia) 1976
64. Jensen B. Bee well – bee wise with bee pollen, bee propolis, royal jelly. Escondido, CA, USA (Bernard Jensen) 1994
65. Jung J. Das Wundermittel Honig. Wroclaw, PL (Dilger) 2015
66. Kaal J. Natural medicine from honey bees (apitherapy). Amsterdam (Kaal’s Printing Hosue) 2017
67. Kaltenegger PL. Honigbüchlein - die Verwendung des Honigs als Nahrungs- und Heilmittel. Regensburg (Josef Habbel) 1926
68. Kappl A. Apitherapie – neue Wege in der Naturheilkunde. Wackersdorf (Gesellschaft für Medizinalpilz- und Mykomolekulare Therapie e.V.) 2017
69. Karsten U. Honig hilft heilen. Wiesbaden (F. Englisch) 1983
70. Khismatullina N. Apitherapy – guidelines for more effective use. Perm/Russland (Mobile) 2005
71. Klimmek EW. Der Genius im Bienenvolk. Nideggen-Abenden (Eigenverlag) 1984
72. Knoller R. Heilen mit Honig. Niedernhausen (Falken) 1995
73. Köwing E. Gesundheit durch die Bienen. Bockhorn-Grabstede (Immen) 1998
74. Koch E. Heilwert des deutschen Honigs. Nürnberg (Deutscher Imkerbund) 1954
75. Kons P. Manuka Honig – Anwendung. Wirkung. Wundermittel. Wroclaw, PL (Kons) 2017
76. Kramer-Wahrenberg A. Heilkraft aus dem Honig. Krummwisch (Königsfurt-Urania) 2018
77. Krämer-Eis I. Die Apitherapie. Neue medizinische Erkenntnisse aus der Bienenapotheke. Gerolstein (Selbstverlag) 2011
78. Kring R. Gesund & fit durch natürliche Ernährung – Honig. Meran (ERF) 2004
79. Köwing E. Gesundheit durch die Bienen. Bockhorn-Grabstede (Eigenverlag) 1998
80. Lächler GL. Natürliche Gesundheit mit Propolis & Co.. Propolis, Honig, Pollen und Gelée royale. Produkte aus dem Bienenstock für Körper und Seele. München (Südwest Verlag) 2011
81. Lange-Ernst M-E. Der Blütenpollen – Ein Minikraftwerk aus der Natur. Frankfurt, Berlin, Wien (Ullstein) 1984
82. Lawrenow WK, Lawrenow JW, Wolkow WI. Natürliches Heilen durch Propolis. (Mochrhena (Elbe-Dnjepr) 2004
83. Lund A. Natürlich heilen mit Honig. München (W. Ludwig) 1997
84. Marbach E. Heilen mit Propolis. Breisach (Eigenverlag) 2009
85. Mateescu C. Apiterapia – como usare I prodotti dell’alveare per la salute. Montespertoli, Italien (M.I.R. Edizioni) 2008
86. McInnes M. Superfood Honig. München (Knaur) 2017
87. McInnes M. The honey diet. London, UK (Coronet) 2014
88. Mix D. Die Heilkraft des Honigs. München (Herbig) 2006
89. Mix D. Manuka-Honig. Ein Naturprodukt mit ungewöhnlicher Heilkraft. Mettmann (360° medien) 2014
90. Mizrahi A, Lensky Y. Bee products – properties, applications and apitherapy. New York (USA) 1997
91. Mraz C. Health and the honeybee. Burlington, USA (Queen City Publications) 1995
92. Munn P, Jones R. Honey and healing. Mytholmroyd, UK (Northern Bee Books) 2017
93. Nagl A. Heilen mit Honig. Gesundheit und Genuss aus dem Bienenstock. Weyarn (Seehamer) 1998
94. Nedoma G. Das große Buch vom Oxymel. ? (Aesculus) 2019
95. Neuhold M. Die Bienen-Hausapotheke. Graz (Leopold Stocker) 2006
96. Neukirch M. Die Geheimnisse der Bienenapotheke. Kernen (Sensei) 2016
97. Nowottnick K. Propolis: Gewinnung - Rezepte - Anwendung, Heilkraft aus dem Bienenvolk. Graz (Leopold Stocker) 2010
98. Oldhaver M. Gelée Royale – Gesundheit aus dem Bienenstock. Wiesbaden (Eubiotika) 2014
99. Oppermann J. Nutzen Sie die Schätze Ihres Imkers. Bielefeld (LebensBaum) 2009
100. Ovsyanik V. Beekeeping, apitherapy and fitotherapy in human hands. Simferopol (Ukraine) 2013
101. Pawletko P. Bienenheilkunde für Mensch und Tier. Reutlingen (Oertel + Spörer) 2019
102. Percie du Sert P. The healing powers of pollen. Paris (Guy Trédaniel) 2006
103. Potschinkova P. Apitherapie. Die Heilkraft von Honig & Co. München (Ehrenwirth) 1999
104. Potschinkova P. Handbuch der Apireflextherapie. Stuttgart (Sonntag) 1996
105. Rohweder D. Propolis - Der Stoff aus dem Gesundheit ist. Berlin (BTV Taschenbuch Verlags GmbH) 1987
106. Sänger A. Honig heilt Wunden. Ein altbekanntes Heilmittel. Bochum/Freiburg (projekt) 2018
107. Scheel JN. Honigbüchlein. London (Dalton House) 2018
108. Scheel JN. Neues Honigbuch. Horb, 1916
109. Schmidt F. Bee venom therapy. Milton Keynes (Lightning Source) 2016
110. Schneider M. Das medizinische Potenzial von Bienenprodukten. Norderstedt (Grin) 2017
111. Schröder A. Gesundes aus Honig Pollen Propolis. Stuttgart (Ulmer) 2012
112. Shipp CL. An introduction to bee medicine. Wroclaw PL 2010
113. Spirit Moon. Apitherapy from a beekeepers’s perspective. Hot Springs, NC, USA Pearce Publishers) 2016
114. Stangaciu S, Hartenstein E. Sanft heilen mit Bienen-Produkten: So nutzen Sie die gesunde Kraft von Honig, Propolis, Gelée Royal & Co. Heidelberg (Haug) 2004
115. Stangaciu S. Sanft heilen mit Honig, Propolis und Bienenwachs. Stuttgart (Trias) 2015
116. Stangaciu S, Raynal-Cartabas C. En bonne santé avec les abeilles. Paris, F (Trédaniel) 2015
117. Stein I. Gelée royale. Gesundheit aus dem Bienenstock. Stuttgart (Hippokrates) 1988
118. Tonsley C. Honey for health. New York, NY, USA (Award Books) 1969
119. Tschenze V. Russisch-Tibetische Honigmassage. Niebüll (Videel) 2001
120. Thuile C. Bienen helfen heilen. Die Apitherapie. Bozen, I (Athesia) 2019
121. Uccusic P. Doktor Biene. Bienenprodukte – ihre Heilkraft und Anwendung. München (Heyne) 1989
122. Ulmer GA. Ein Geschenk der Natur mit einzigartigem Nähr- und Energiewert. Produkte der Bienen. Tuningen (Eigenverlag) 1996
123. Vetrovec J. Apitherapie – Heilung durch Bienenprodukte. Redaktion der Zeitschrift "Gesundheit", 1983
124. Voggenreiter -Degkwitz B. Honig ist nicht nur süß. Wissenswertes über die Biene und ihre Produkte. München
125. Wade C. Bienen-Power. Gesundheit aus dem Bienenstock. München (Ehrenwirth) 1992
126. Walji H. Bee health. San Francisco, CA, USA (Thorsons) 1996
127. Weilhofen J. Gelée royale – Königliches Gesundheitselixier. Troisdorf (Sanoform) 2006
128. Wirth T. L’apitherapie ou comment l’abeillevous soigne. Lyon, F (Les Trois Roses) 2006
129. Yoirish N. Curative properties of honey and bee venom. Honolulu, Hawaii (University Press of the Pacific) 2001
